# Supplementary material for: Mass analyzed threshold ionization detected infrared spectroscopy: isomerization activity of the phenol–Ar cluster near the ionization threshold
Source: Royal Society of Chemistry journal article supplement (doi:10.1039/c4cp04584j), 2014-11-27
Supplement: c4cp04584j1.pdf [file c4cp04584j1.pdf]

## Supporting Information

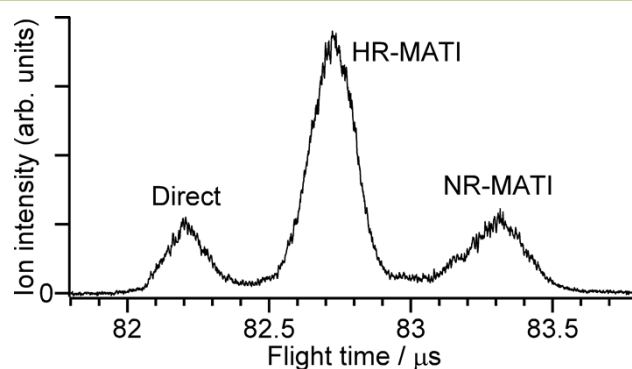

**Fig. S1** Splitting of the PhOH–Ar mass peak in the time-of-flight mass spectrometer under application of the negative pulse for the high resolution MATI spectroscopy, setting the total energy ( $v_{\text{exc}} + v_{\text{ion}}$ ) to  $IE_0(\pi)$  ( $68447 \text{ cm}^{-1}$ ). Each peak provides direct ionization, high resolution (HR)-MATI, and normal resolution (NR)-MATI signal, respectively.

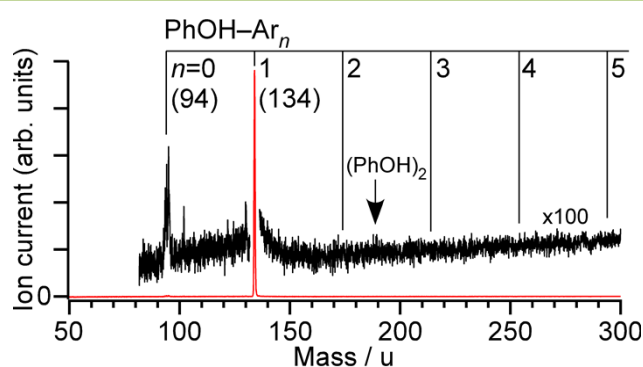

**Fig. S2** Time-of-flight mass spectrum of  $\text{PhOH-Ar}_n$  recorded under the same condition as the MATI-IR spectra described in the text for resonant soft ionization of PhOH–Ar via its  $S_1$  origin.

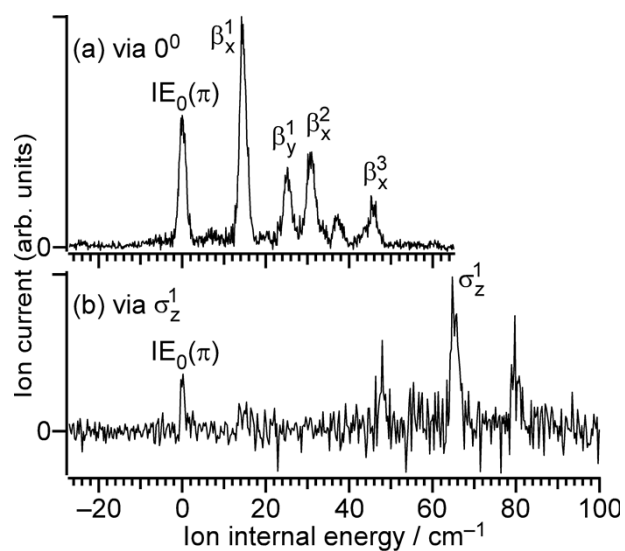

**Fig. S3** Comparison between MATI spectra of PhOH–Ar recorded via the (a) 0<sup>0</sup> and (b) σ<sub>z</sub><sup>1</sup> levels in the S<sub>1</sub> state.

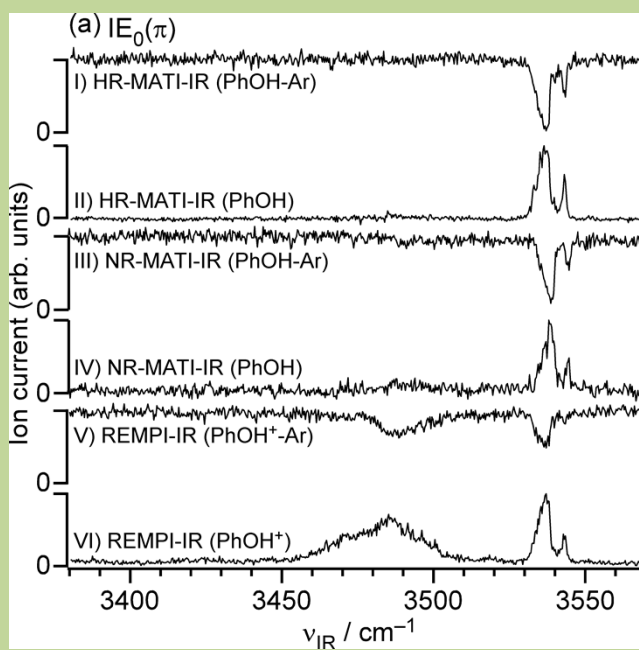

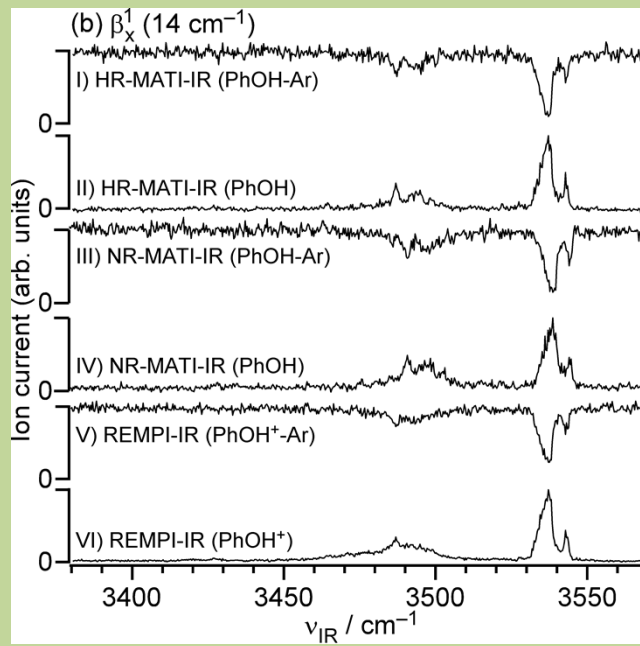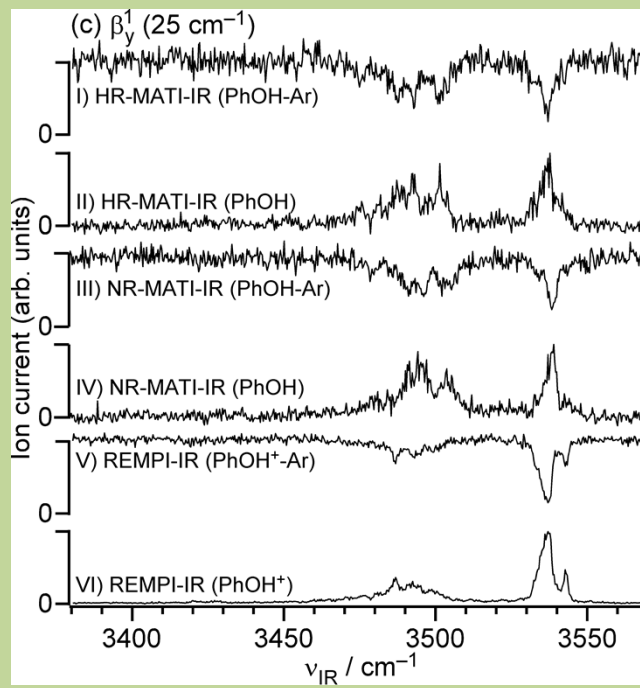

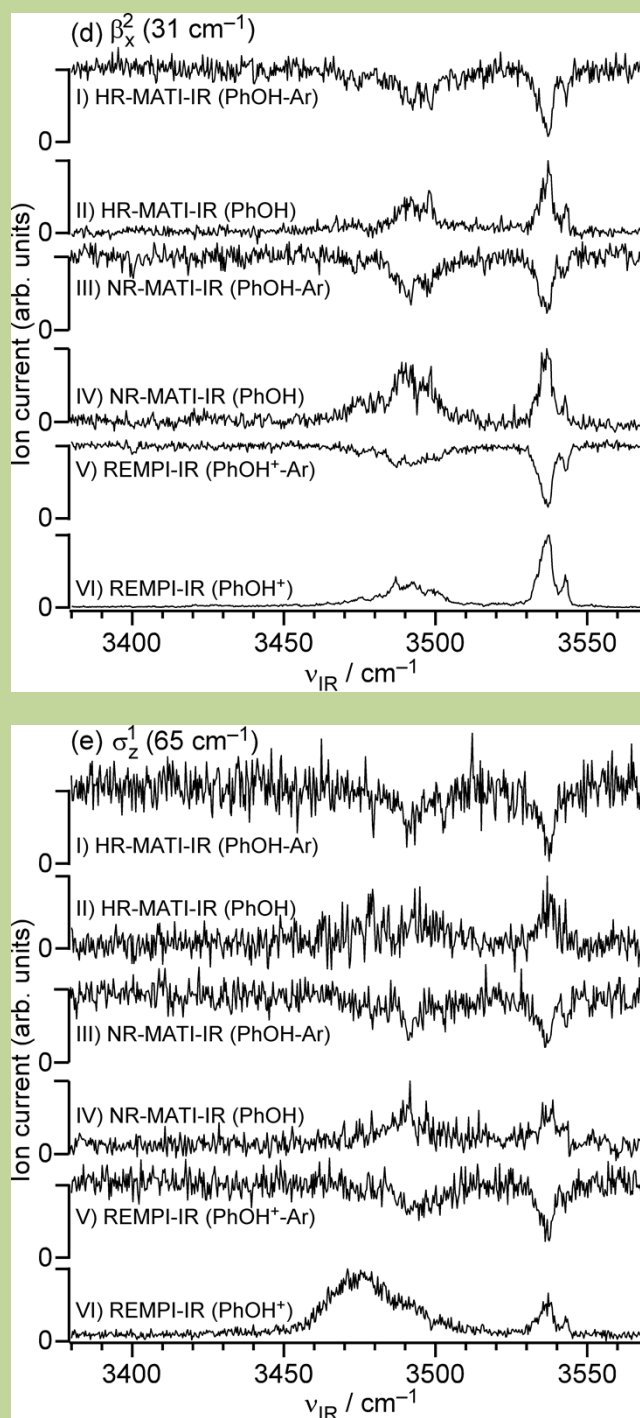

**Fig. S4** Comparison between high-resolution MATI monitored IR (HR-MATI-IR (I) and II)), normal-resolution MATI monitored IR (NR-MATI-IR (III) and IV)), and REMPI-IR (V) and VI)) spectra of PhOH–Ar monitored in the PhOH<sup>+</sup>–Ar and PhOH<sup>+</sup> mass channels at the (a)  $\text{IE}_0(\pi)$ , (b)  $\beta_x^1$ , (c)  $\beta_y^1$ , (d)  $\beta_x^2$ , and (e)  $\sigma_z^1$  levels, respectively.
